# Supplementary material for: A femtosecond Bessel laser for preparing a nontoxic slippery liquid-infused porous surface (SLIPS) for improving the hemocompatibility of NiTi alloys
Source: Royal Society of Chemistry journal article supplement (doi:10.1039/d0bm01369b), 2020-01-01
Supplement: d0bm01369b1.pdf [file d0bm01369b1.pdf]

### Supporting Information

#### Femtosecond Bessel Laser Preparing a Nontoxic Slippery Liquid-Infused Porous Surface (SLIPS) for Improving the Hemocompatibility of a NiTi Alloy

Yang Cheng,<sup>1,3</sup> Qing Yang,<sup>1,3,\*</sup> Yu Lu,<sup>2,3</sup> Jiale Yong,<sup>2,3,\*</sup> Yao Fang,<sup>2,3</sup> Xun Hou<sup>2</sup>, and Feng Chen<sup>2,3,\*</sup>

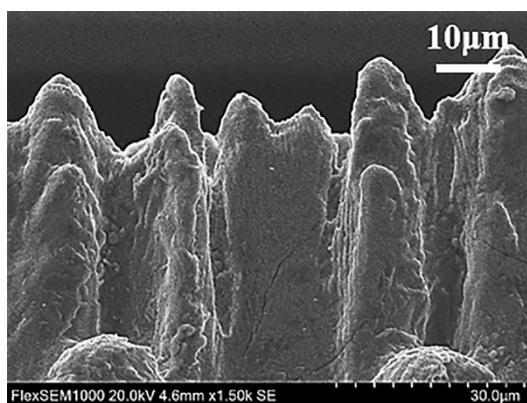

**Figure S1.** The sectional SEM image of the laser-induced microholes on NiTi alloy that was processed by femtosecond Bessel laser.

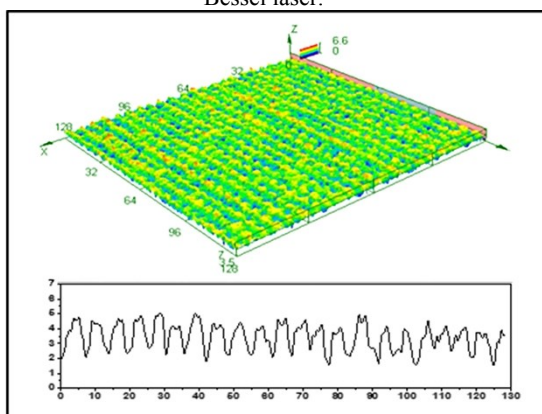

**Figure S2.** Laser confocal microscopy image of the porous structure on NiTi alloy that was processed by femtosecond Bessel laser.
